# Supplementary material
Source: publisher figshare collection journal article supplement (https://gsajournals.figshare.com/articles/dataset/_/16811614)
Supplement: Supplementary file 1 [file 1]

## Sheet: ccs_results
SRR number	Tissue type	Raw file	ZMWs input	ZMWs passing filter	ZMWs failing filter
SRR12768301	Testis	m54193_190804_003156.subreads	290100	188991	101109
SRR12768301	Testis	m54193_190730_213558.subreads	503178	262100	241078
SRR12768302	Ovary	m54193_190819_130350.subreads	162996	88149	74847
SRR12768302	Ovary	m54193_190817_160910.subreads	68418	38087	30331
SRR12768302	Ovary	m54193_190731_175637.subreads	99916	31569	68347
SRR12768303	Adult male pronephros	m54193_190407_160328.subreads	652118	503461	148657
SRR12768303	Adult male pronephros	m54193_190410_155225.subreads	687346	494221	193125
SRR12768304	Adult female pronephros	m54193_190406_194330.subreads	620480	506758	113722
SRR12768304	Adult female pronephros	m54193_190409_193215.subreads	628143	479981	148162
SRR12768305	Adult male brain	m54193_190226_161020.subreads	374585	166493	208092
SRR12768305	Adult male brain	m54193_190214_204145.subreads	252800	115726	137074
SRR12768306	Adult female brain	m54193_190221_105407.subreads	218557	94505	124052
SRR12768306	Adult female brain	m54193_190213_040038.subreads	149205	65286	83919
SRR12768313	Adult male liver	m54193_190215_170235.subreads	283651	177668	105983
SRR12768313	Adult male liver	m54193_190227_123036.subreads	437562	225495	212067
SRR12768314	Adult female liver	m54193_190214_002109.subreads	500795	350339	150456
SRR12768314	Adult female liver	m54193_190222_071504.subreads	439539	259810	170729
	70 hpf scISOr-Seq		3951346	2171135	1780211

## Sheet: lima
SRR number	Tissue type	Raw file	ZMWs input	ZMWs passing filter	ZMWs failing filter
SRR12768301	Testis	m54193_190804_003156.subreads	188991	152883	35108
SRR12768301	Testis	m54193_190730_213558.subreads	262100	212903	49197
SRR12768302	Ovary	m54193_190819_130350.subreads	88149	65887	22262
SRR12768302	Ovary	m54193_190817_160910.subreads	38087	28581	9506
SRR12768302	Ovary	m54193_190731_175637.subreads	31569	23164	8405
SRR12768303	Adult male pronephros	m54193_190407_160328.subreads	503461	442964	60497
SRR12768303	Adult male pronephros	m54193_190410_155225.subreads	494221	433701	60520
SRR12768304	Adult female pronephros	m54193_190406_194330.subreads	506758	444508	62250
SRR12768304	Adult female pronephros	m54193_190409_193215.subreads	479981	418911	61070
SRR12768305	Adult male brain	m54193_190226_161020.subreads	166493	124002	42491
SRR12768305	Adult male brain	m54193_190214_204145.subreads	115726	87573	28153
SRR12768306	Adult female brain	m54193_190221_105407.subreads	94505	71050	22455
SRR12768306	Adult female brain	m54193_190213_040038.subreads	65286	50071	15215
SRR12768313	Adult male liver	m54193_190215_170235.subreads	177668	137835	39833
SRR12768313	Adult male liver	m54193_190227_123036.subreads	225495	172173	53322
SRR12768314	Adult female liver	m54193_190214_002109.subreads	350339	299320	51019
SRR12768314	Adult female liver	m54193_190222_071504.subreads	259810	217802	42008
	70 hpf scISOr-Seq		2171135	2169846	1289

## Sheet: scISOr-Seq_custom_script
		ZMWs input	ZMWs passing filter	ZMWs failing filter
	70 hpf scISOr-Seq	2169846	703914	1465932

## Sheet: refine
SRR number	Tissue type	Raw file	num_reads_fl	num_reads_flnc	num_reasd_flnc_polyA
SRR12768301	Testis	m54193_190804_003156.subreads	153883	148068	147976
SRR12768301	Testis	m54193_190730_213558.subreads	212903	206112	205983
SRR12768302	Ovary	m54193_190819_130350.subreads	65887	64577	64480
SRR12768302	Ovary	m54193_190817_160910.subreads	28581	27971	27933
SRR12768302	Ovary	m54193_190731_175637.subreads	23164	22495	22444
SRR12768303	Adult male pronephros	m54193_190407_160328.subreads	442964	429155	429000
SRR12768303	Adult male pronephros	m54193_190410_155225.subreads	433701	420995	420838
SRR12768304	Adult female pronephros	m54193_190406_194330.subreads	444508	424849	424701
SRR12768304	Adult female pronephros	m54193_190409_193215.subreads	418911	402071	401902
SRR12768305	Adult male brain	m54193_190226_161020.subreads	124002	120082	119912
SRR12768305	Adult male brain	m54193_190214_204145.subreads	87583	84979	84858
SRR12768306	Adult female brain	m54193_190221_105407.subreads	72050	68992	68887
SRR12768306	Adult female brain	m54193_190213_040038.subreads	50071	48032	47964
SRR12768313	Adult male liver	m54193_190215_170235.subreads	137835	130002	129911
SRR12768313	Adult male liver	m54193_190227_123036.subreads	172173	162997	162897
SRR12768314	Adult female liver	m54193_190214_002109.subreads	299320	290539	290382
SRR12768314	Adult female liver	m54193_190222_071504.subreads	217802	211473	211388
