# Supplementary material
Source: publisher figshare collection journal article supplement (https://gsajournals.figshare.com/articles/dataset/_/16811614)

A

*tyr*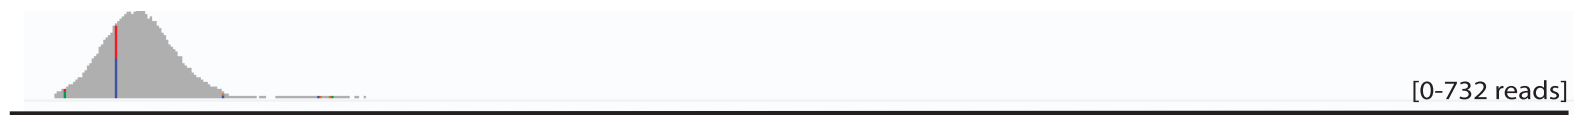

Ensembl

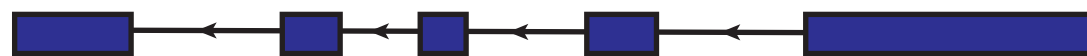

ScISOr-Seq

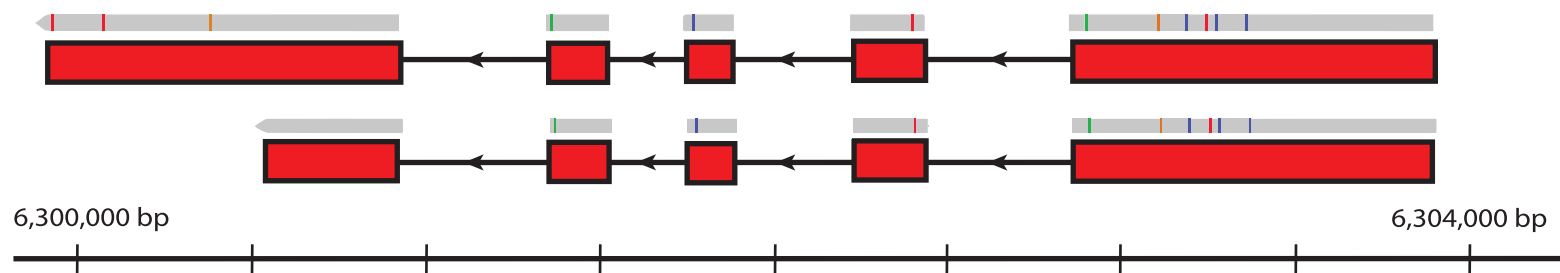

B

*foxd3*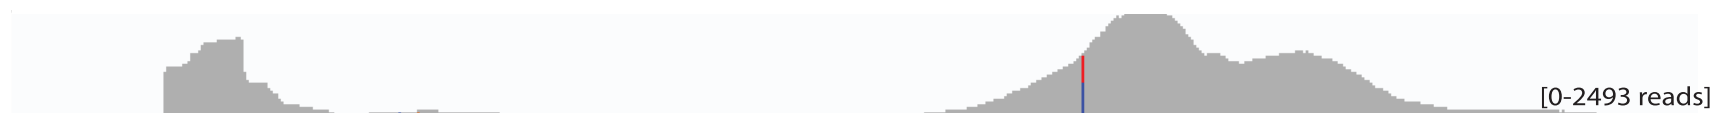

Ensembl

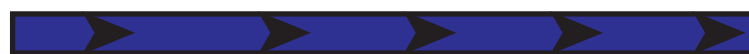

ScISOr-Seq

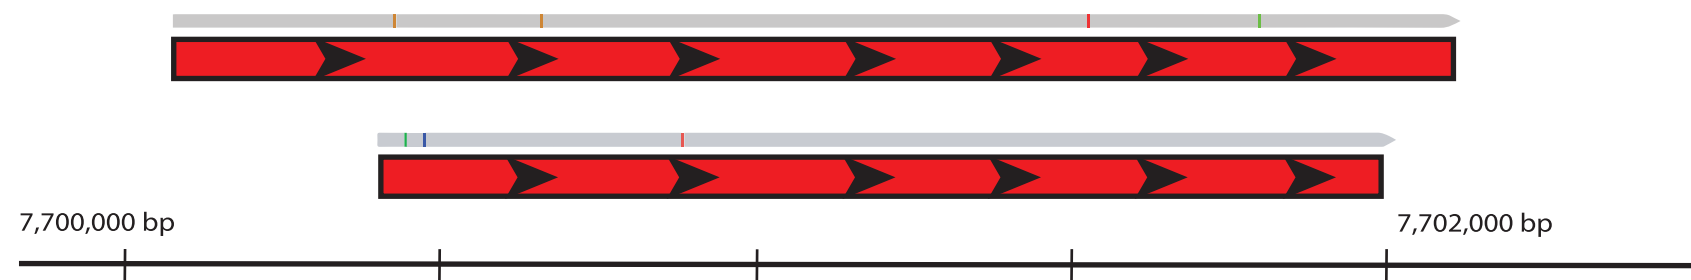

C

*gata5*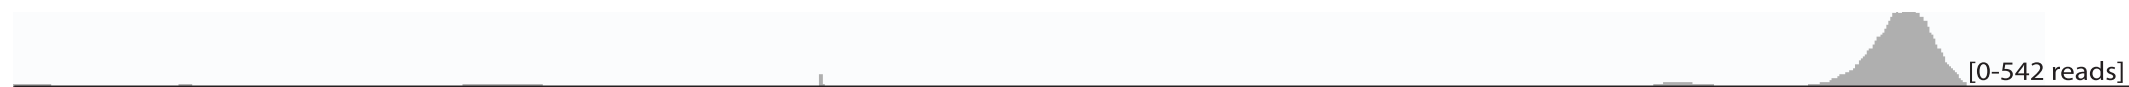

Ensembl

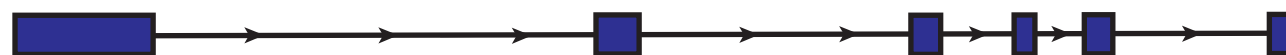

ScISOr-Seq

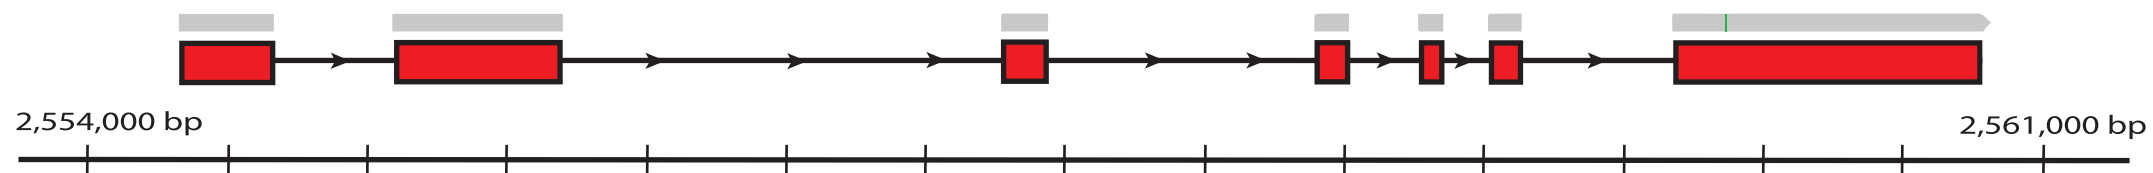

Supplement: Supplementary file 1 [file 1]

A

## sox9a expression at 70hpf

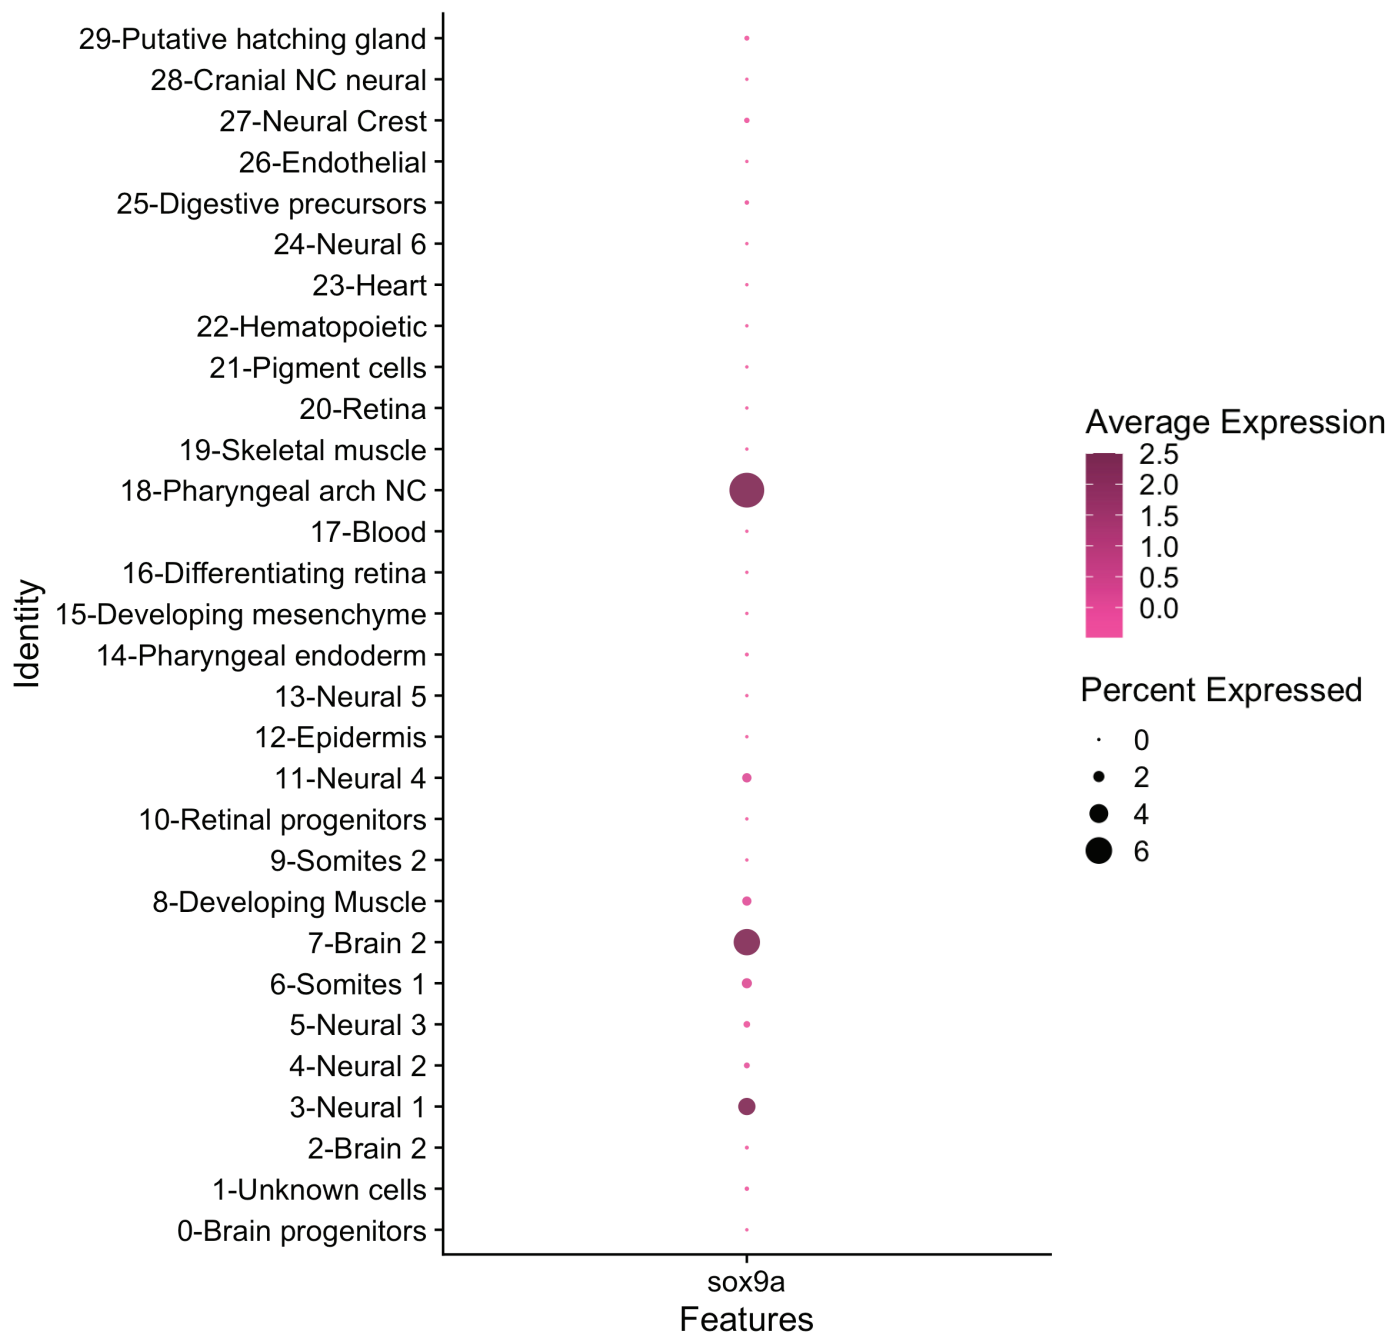

B

## sox9b expression at 70hpf

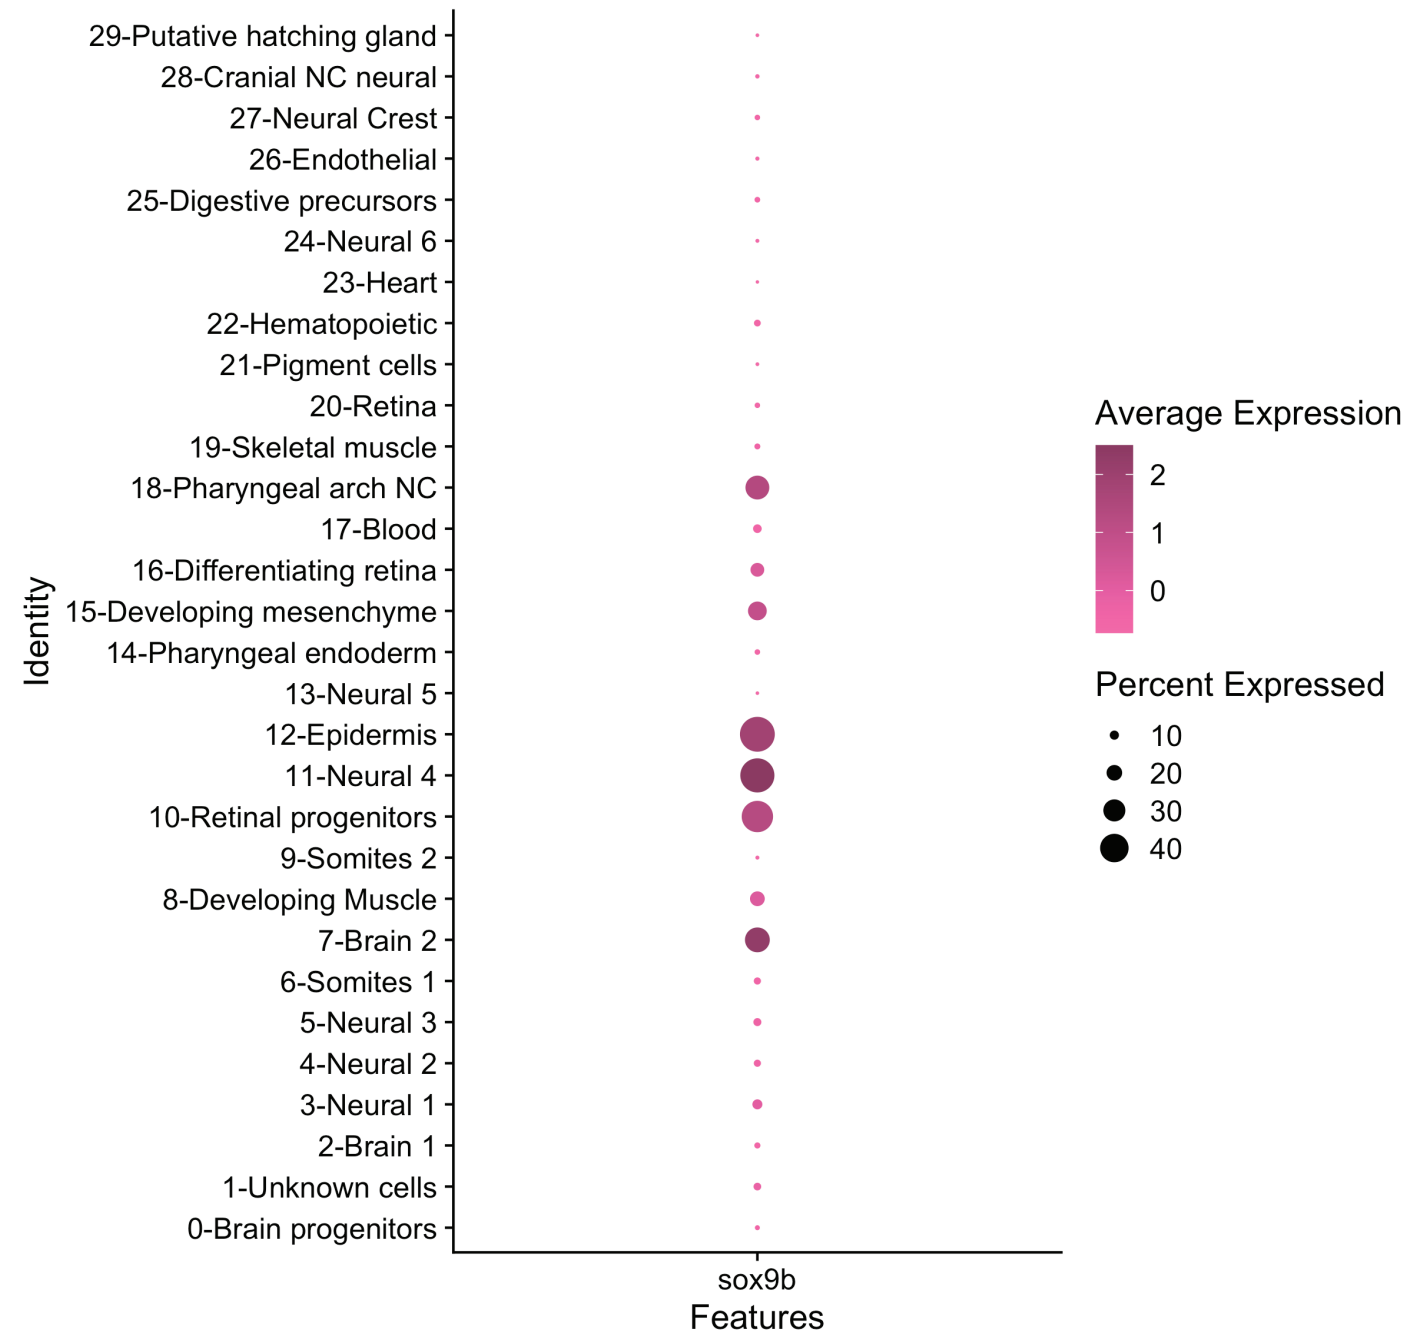

Supplement: Supplementary file 2 [file 1]
